# Supplementary material
Source: HighWire-hosted journal article supplement (https://bmjopen.bmj.com/content/14/6/e081360)
Supplement: inline-supplementary-material-2 [file inline-supplementary-material-2.pdf]

APPENDICES:

Appendix I: Search strategy for PubMed database

1. ("MRI" OR "fMRI" OR "EEG" OR "PET" OR "neuroimaging" OR "biological research" OR "biological sample\*" OR "biologic\*" OR "blood sample\*" OR "urine sample\*")
- AND
2. ("mental health" OR "mental" OR "depression" OR "anxiety" OR "self harm" OR "self-harm" OR "suicide" OR "psychiatric" OR "psychopathology" OR "mood disorder" OR "autism" OR "neurodivergence")
- AND
3. ("youth\*" OR "adolescent" OR "adolescence" OR "teen\*" OR "teenager\*" OR "high school student\*" OR "AYA")
- AND
4. ("retention" OR "recruitment" OR "recruit" OR "recruited" OR "enroll" OR "enrol" OR "enrollment" OR "enrolment" OR "enrolling" OR "enrolled" OR "participation")

Appendix II: Data extraction form

CELEBRATE – WP1 Scoping review data extraction template (version 1)

|                                  |  |
|----------------------------------|--|
| Date form completed (dd/mm/yyyy) |  |
| Reviewer name                    |  |
| Citation                         |  |

|                                              |  |
|----------------------------------------------|--|
| Authors                                      |  |
| Year of publication                          |  |
| Country of origin                            |  |
| Indication (eg/ depression or anxiety)       |  |
| Aims                                         |  |
| Methodology/study design                     |  |
| Sample size                                  |  |
| Sample age                                   |  |
| Sample socio-demographics                    |  |
| Biological measures (list)                   |  |
| Biological outcomes (list)                   |  |
| Recruitment details                          |  |
| Retention details (no. of withdrawals)       |  |
| Young people engagement strategies described |  |
| Stakeholder engagement described             |  |
| Community engagement described               |  |
| Feedback strategies described                |  |

|        |  |
|--------|--|
| Notes: |  |
|--------|--|
